# Supplementary material
Source: PubMed Central journal article supplement (PMC2096436)
Supplement: JCI0732578sd.pdf [file JCI0732578sd.pdf]

## Supplemental Figure 1 (Burkart et al)

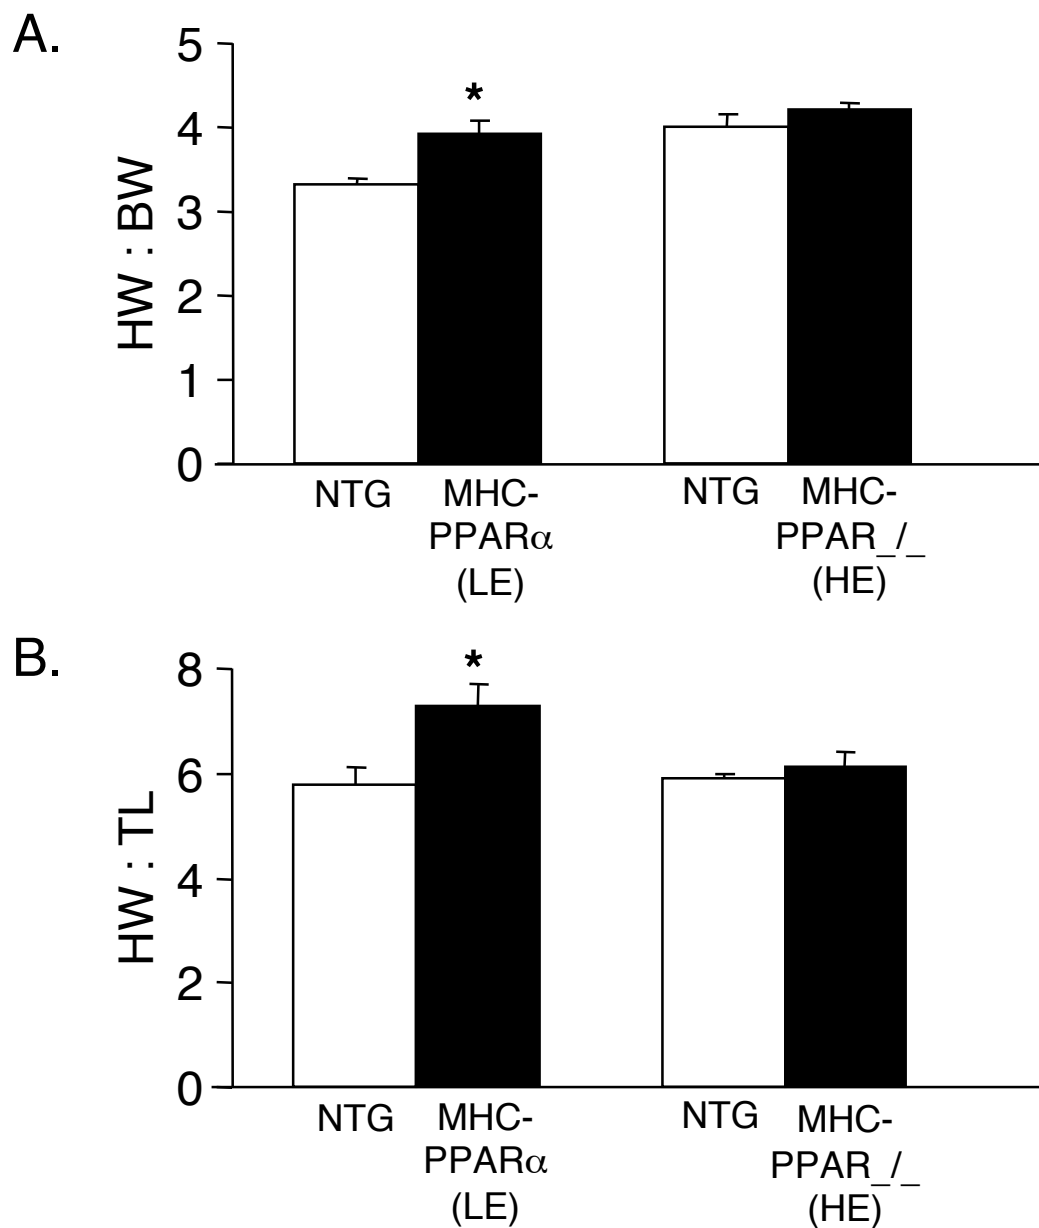

**Supplemental Figure 1.** Cardiomyopathy develops in MHC-PPAR $\alpha$  (LE) mice, but not MHC-PPAR $^{-/-}$  (HE) mice. Bars represent (A) mean biventricular-to-body-weight (HW:BW) ratios and (B) mean biventricular-to-tibial-length (HW:TL) ratios for 8-week old male and female MHC-PPAR $^{-/-}$  (HE) and MHC-PPAR $\alpha$  (LE) mice, and respective NTG littermates ( $n \geq 15$  per group). \*,  $p < 0.05$  vs. NTG littermates.

## Supplemental Figure 2 (Burkart et al)

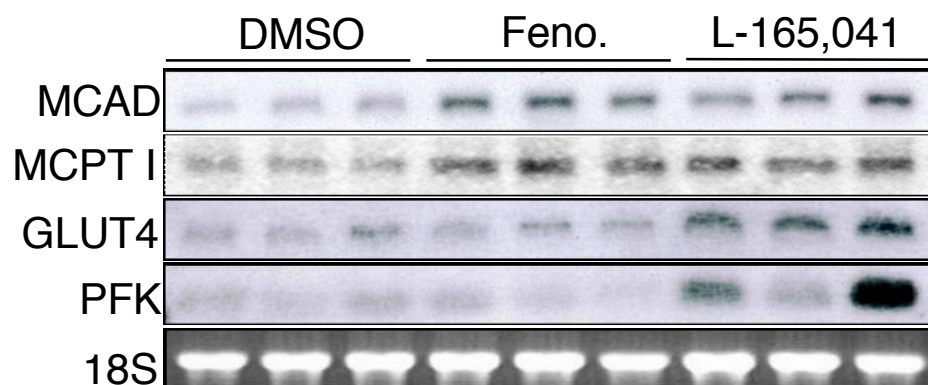

**Supplemental Figure 2.** Representative Northern blot analyses performed with RNA isolated from rat ventricular cardiomyocytes exposed to fenofibrate (Feno), L-165,041, or vehicle (DMSO) for 48 hours. Gene abbreviations are defined in the text. 18s rRNA is shown as a loading control.

### Supplemental Figure 3 (Burkart et al)

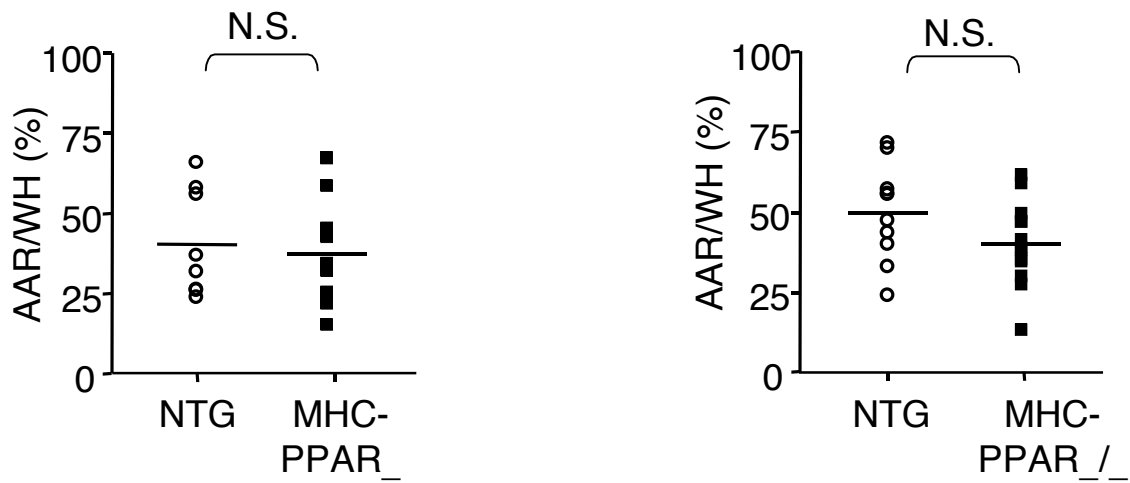

**Supplemental Figure 3.** Graphs represent percent of area-at-risk (AAR) normalized to the whole heart (WH) for MHC-PPAR $\alpha$  or MHC-PPAR $\beta/\delta$  mice, or non-transgenic littermates, subjected to myocardial I/R injury. As shown, the mean percent AAR/WH (horizontal bar) was not different between NTG and MHC-PPAR $\alpha$  mice ( $42.4 \pm 5.6\%$  vs.  $34.9 \pm 3.7\%$ ) or between NTG and MHC-PPAR $\beta/\delta$  mice ( $49.6 \pm 4.8\%$  vs.  $40.0 \pm 3.6\%$ ).
